1 **Variability in fitness effects and the limitations of fitness optimization**

2

3 Christopher J Graves<sup>1\*</sup> and Daniel M Weinreich<sup>1\*</sup>

4

5 <sup>1</sup> Brown University, Department of Ecology and Evolutionary Biology and Center for  
6 Computational and Molecular Biology. Providence, RI, USA

7

8 \* Corresponding authors: [christopher\\_graves@brown.edu](mailto:christopher_graves@brown.edu) and [daniel\\_weinreich@brown.edu](mailto:daniel_weinreich@brown.edu);

9 Box G-W, 80 Waterman Street

10 Brown University, Providence, RI 02912. Phone: 401-863-3937.

11

12 Running title: Limitations of fitness optimization

13

14 Keywords: Natural selection, Fitness optimization, Varying environments, Group selection,

15 Inclusive fitness, Mutation rate

16

17 **Abstract**

18

19 Evolutionary biologists commonly assess the evolutionary advantage of an allele based on its

20 effects on the lifetime survival and reproduction of individuals. However, alleles affecting traits

21 like sex, evolvability, and cooperation can cause fitness effects that depend heavily on

22 differences in the environmental, genetic, and social context of individuals carrying the allele.

23 This variability makes it difficult to summarize the evolutionary fate of an allele based solely on

24 its effects on any one individual. In this review we show how attempts to average over variability

25 in the fitness effects of an allele can sometimes cause misleading results. We then describe a

26 number of intriguing new evolutionary phenomena that have emerged in studies that explicitly

27 model the fate of alleles that influence long-term lineage dynamics. We conclude with prospects

28 for generalizations of population genetics theory and discuss how this theory might be applied to

29 the evolution of infectious diseases.

30

|    |                                                   |
|----|---------------------------------------------------|
| 31 | <b>Contents</b>                                   |
| 32 | I. INTRODUCTION                                   |
| 33 | II. LINEAGE-INVARIANT FITNESS EFFECTS             |
| 34 | III. LINEAGE-VARIABLE FITNESS EFFECTS             |
| 35 | <i>Environmental Interactions</i>                 |
| 36 | <i>Genetic Interactions</i>                       |
| 37 | <i>Social Interactions</i>                        |
| 38 | IV. LIMITATIONS TO FITNESS AVERAGES               |
| 39 | <i>Limitations due to short-sighted selection</i> |
| 40 | <i>Beyond fitness averages</i>                    |
| 41 | V. IMPLICATIONS FOR INFECTIOUS DISEASE EVOLUTION  |
| 42 | VI. CONCLUSIONS                                   |
| 43 |                                                   |

## 44 I. Introduction

45

46 Evolution by natural selection is driven by heritable differences in the reproductive success of  
47 individuals. However, the long-term outcome of natural selection depends not only on the effects  
48 of an allele on individual bearers but also on its effects across its entire lineage of descendants-  
49 defined here as the genealogy of an allele from its origination to its ultimate fixation or  
50 extinction in the population (Sidebar 1). When fitness effects are invariant across a lineage, the  
51 long-term fate of an allele can be deduced in a relatively straightforward manner from its  
52 recursive effects on survival and reproduction across descendent members of the lineage. In  
53 other cases, the evolutionary success of an allele is not an obvious consequence of its effects on  
54 individuals. For example, variable environments can cause the same allele to have differing  
55 effects on fitness depending on an individuals' environmental context. Similarly, fitness effects  
56 may vary due to the presence of other alleles in the genome, which are themselves polymorphic  
57 in the population. In such cases, it is often presumed that traits will tend to spread by natural  
58 selection so long as they are beneficial to their carriers on average (Eshel 1973, Nunney 1999).  
59 This implies that natural selection favors traits that are beneficial not strictly to individuals, but  
60 to genetic lineages as a whole.

61

62 The concept that natural selection may optimize quantities related to the average success of an  
63 allele across a lineage has arisen in a wide range of problems ranging from varying environments  
64 to the evolution of sex and cooperation (Akçay and Van Cleve 2016, Eshel 1973, Kussell and  
65 Leibler 2005, Lehmann, et al. 2016, Nunney 1999, Nunney 1999). In general, this idea arises  
66 when the fitness effect of an allele varies between individual carriers, thereby limiting the ability

67 to infer the long-term success of an allele based on measures of individual fitness alone. A large  
68 class of evolutionary problems fit this description and they can be classified by whether the  
69 variability across a lineage arises due to environmental, genetic, or social factors. We outline  
70 examples of each in Table 1 and describe them in more detail in the main text. Each source of  
71 variation has largely been discussed within its own body of literature, where equivalent concepts  
72 are used to describe a distinct set of adaptations, often with distinct terminology. Despite some  
73 obvious similarities, there have been few attempts at synthesizing what is known in each of these  
74 cases into a formal quantitative theory of the evolution of alleles with lineage-variable fitness  
75 effects.

76

77 Averaging the fitness effects of an allele across a lineage shifts the target of adaptation from  
78 individuals to lineages. However, one must acknowledge possible limitations in the ability of  
79 natural selection to favor traits that confer a long-term benefit to a lineage. Specifically, natural  
80 selection is myopic in nature- acting to increase the frequency of traits that confer an immediate  
81 advantage to individuals without regard to their future utility to a lineage. This shortsightedness  
82 can have dramatic consequences, particularly if it results in the permanent extinction of an allele  
83 prior to it realizing any average benefit in the long-term. Indeed, the notion that natural selection  
84 will act most strongly on alleles that confer a short-term advantage was championed by Maynard  
85 Smith (1964) and Williams (1966) in their now famous critique of group selection, and is still in  
86 use (Lynch 2007, Sniegowski and Murphy 2006). When does natural selection favor traits that  
87 confer a long-term benefit averaged across a lineage and when does shortsighted selection limit  
88 this ability?

89

90 After briefly summarizing results from classical, lineage-invariant theory that successfully  
91 relates individual fitness to a lineage's eventual fate, we discuss a diversity of examples of  
92 lineage-variable fitness, i.e., cases in which the fitness effects of an allele vary across its lineage  
93 of descendants. We illustrate the shortcomings of averaging variability across the lineage in  
94 finite populations, in which alleles that are beneficial in the long-term are nevertheless  
95 vulnerable to extinction. Consequently, shortsighted selection in finite populations can limit the  
96 ability of natural selection to optimize even these measures of fitness. Finally, we discuss other  
97 counterintuitive results that emerge in examples where lineage-variable fitness is modeled  
98 explicitly. These results show that the fate of an allele can be sensitive not only to its fitness  
99 effects across a lineage, but to features unrelated to classical notions of fitness, such as the  
100 population size. We conclude by highlighting implications for the evolution of infectious  
101 diseases and directions for future work.

102

## 103 **II. Lineage-Invariant Fitness Effects**

104

105 Evolutionary biologists are fundamentally concerned with understanding the outcome of natural  
106 selection on traits that influence the survival and reproduction of their carriers. Before discussing  
107 cases in which the fitness effects of an allele are variable across its lineage we first consider the  
108 case where fitness effects are invariant across a lineage. Our approach throughout will be on the  
109 field of population genetics, which has a rich tradition of analyzing dynamical models that  
110 combine various evolutionary forces including natural selection, genetic drift, and mutation.  
111 Such dynamical treatments of evolution provide a comprehensive analysis of a lineage – starting  
112 from its origination in the population and ending with its ultimate fixation or extinction. We will

113 therefore be decidedly brief in our overview of other aspects of evolutionary theory, which  
114 include techniques such as game theory and quantitative genetics.

115

116 Consider an allele that influences the expected number of surviving offspring produced over the  
117 lifetime of its carriers. Formally, we allow the precise number of offspring produced by any  
118 particular individual in this lineage to be a Poisson random variable drawn independently from  
119 an identical distribution, with mean defined as the Wrightian fitness,  $w$ . This concept of fitness  
120 articulates well with the Darwinian notion of fitness as lifetime reproductive success. The most  
121 fundamental consideration regarding the fate of an allele by natural selection is whether the allele  
122 influences this measure of fitness relative to the resident “wild type” in the population. In  
123 population genetics, this fitness effect is most often denoted with the selection coefficient,  $s$ ,  
124 defined as the proportional change in expected number of offspring relative to the wild-type:  $s \equiv$   
125  $w_{\text{mut}}/w_{\text{wt}} - 1$ .

126

127 Now consider a population with constant size,  $N$ . Since the number of surviving offspring born  
128 to an individual is a random variable, we allow for random fluctuations in the number of  
129 individuals carrying an allele as the basis for genetic drift. Assuming that generations are discrete  
130 and non-overlapping and approximating the Poisson offspring distribution with a binomial so  
131 that the population size remains fixed, we can describe the allele frequency dynamics using the  
132 Wright-Fisher model. We emphasize that the Wright-Fisher process and related models capture  
133 the interplay between natural selection and genetic drift in finite populations by incorporating  
134 stochasticity in the number of surviving offspring born to each individual. However, by

135 definition all models of lineage-invariant selection assume that the distribution in that number  
136 remains constant across the lineage (Figure 1A).

137

138 Given this framework, we can obtain solutions for a number of quantities pertaining to the fate of  
139 a mutant allele based on its selection coefficient,  $s$ . Of particular interest given our concern with  
140 the ultimate fate of a lineage is the probability that an allele eventually displaces all alternatives  
141 in the population, known as the probability of fixation,  $P_{\text{fix}}$ . Kimura (Kimura 1962) found this  
142 quantity for a mutation starting at frequency  $x_0$ , in a haploid, randomly mating population of size  
143  $N$ , using a continuous diffusion approximation of the Wright-Fisher process:

$$144 \quad P_{\text{fix}}(N, s, x_0) = \frac{1 - e^{-Nsx_0}}{1 - e^{-Ns}}. \quad (1)$$

145 This result highlights many of the key features of classical population genetics theory. Solving  
146 for the limit as  $s$  approaches zero leads to  $P_{\text{fix}} = x_0$ . This defines the neutral expectation that the  
147 probability of fixation of an allele is simply equal to its starting frequency. Focusing on the case  
148 where an allele starts from a single mutation in the population, we take  $x_0 = 1/N$ . Now consider a  
149 beneficial mutation,  $s > 0$ . Here,  $P_{\text{fix}} > 1/N$ , but only asymptotically approaches  $s$ , even as  
150 population size  $N$  tends to infinity (Haldane 1927). In other words, fixation of even a strongly  
151 beneficial mutation is not assured, reflecting the fact genetic drift dominates allele frequency  
152 dynamics until there are roughly  $1/s$  copies in the population. This effect is worsened in small  
153 populations since  $1/s$  copies may be an appreciable fraction of the population. Thus as  $s$  or  $N$  get  
154 small,  $1/s$  approaches  $N$  and genetic drift comes to dominate selection. This result implies that  
155 mutations are effectively neutral from the standpoint of natural selection, unless  $s > 1/N$ . Finally,  
156 and somewhat less intuitively, Kimura's formula also shows that even deleterious mutations ( $s <$



157 0), can have a nonzero fixation probability. Here again, genetic drift can overwhelm natural  
158 selection in populations roughly no larger than  $1/|s|$  individuals.

159

### 160 **III. Lineage-Variable Fitness Effects**

161

162 Under the assumption that an allele exerts a constant, lineage-invariant effect on fitness,  
163 Equation 1 demonstrates that a mutant's fitness effect is sufficient to predict the fate of its  
164 lineage. We now turn to cases where variability in the fitness effects of an allele can cause this  
165 result to fail. Examples of lineage-variable fitness effects emerge under many realistic biological  
166 scenarios, where alleles do not act alone to influence fitness but interact with different  
167 environmental, genetic, or social factors (Table 1, Figure 1). Consequently, the number of  
168 offspring produced by individuals in a lineage may not be drawn from any fixed distribution,  
169 violating the assumption of lineage invariance underlying Equation 1. We emphasize that such  
170 variability in offspring number is beyond that captured in models like Wright-Fisher, which  
171 typically require the distribution of offspring number to be fixed. Our goal in this section is to  
172 highlight some of the relevant examples of variability in fitness of an allele represented by the  
173 three classes in Table 1, and to build some intuition for how they have been handled in the  
174 literature. We also seek to show that adaptations associated with each example depend uniquely  
175 on the effects of an allele on the fate of a lineage rather than on individual success.

176

#### 177 *Environmental interactions*

178

179 Natural environments are inherently variable and therefore present an obvious challenge to the  
180 assumption that an allele will have the same effect on fitness for all members of a lineage.

181 Variation in the environment over time will cause contemporary members of a lineage to  
182 experience the same distribution of offspring number, but this distribution now depends on time  
183 (Figure 1B). Contrastingly, under spatial variation in the environment, contemporary members  
184 will experience fitness effects that depend on the interaction between their shared allele and the  
185 local environment they encounter. This again implies that no single distribution in offspring  
186 number will be generally applicable. In either case, if environmental change is so rapid that  
187 individuals encounter a succession of different environments in their lifetime, then fitness can be  
188 described as a lifetime average of total survival and reproduction (Levins 1968). We will  
189 therefore focus on the more interesting case where environments vary on a timescale greater than  
190 the generation time of the organism; here averaging can often be misleading.

191

192 The greatest progress has been made in models of temporally varying environments, in which  
193 case the selection coefficient  $s$  is no longer a constant, but a time-dependent quantity,  $s(t)$ .  
194 Formal analysis typically requires specifying a particular form of  $s(t)$  at the expense of  
195 generality. It is commonly assumed that environments are randomly drawn from a fixed  
196 distribution or that that the population size is infinite (Dempster 1955, Gillespie 1973, Kussell  
197 and Leibler 2005, Lewontin and Cohen 1969). Under these assumptions, a diverse set of models  
198 can be integrated based on how variation in fitness correlates within and between members of  
199 two competing lineages (Frank and Slatkin 1990). We note, however, that such an approach is  
200 limited to deriving the instantaneous change in allele frequency rather than explicitly modeling  
201 lineage dynamics. Another consequence of assuming random environmental change and infinite  
202 populations is that natural selection will favor alleles that increase the long-term growth rate of a  
203 lineage, averaged over all environments (Dempster 1955, Gillespie 1973, Kussell and Leibler

204 2005, Lewontin and Cohen 1969, Stearns 2000). Formally, this corresponds to an increase in the  
205 geometric mean fitness, or equivalently, the mean intrinsic growth rate (Sidebar 2), and is  
206 generalizable to other forms of  $s(t)$  (Cvijović, et al. 2015). Importantly, even arbitrarily large but  
207 finite populations experience genetic drift, which can limit the ability to maximize the long-term  
208 growth rate of lineages in certain environmental scenarios. We discuss these limitations in more  
209 detail below.

210

211 Despite its limitations in finite populations, the principle that in variable environments natural  
212 selection acts to increase geometric mean fitness is a key theoretical insight, and it is presumed  
213 to underlie numerous adaptations. These include strategies like developmental and phenotypic  
214 plasticity that allow adaptive phenotypic responses to environmental conditions that may not be  
215 encountered by all individuals (Meyers and Bull 2002, Via, et al. 1995). Most notable is the  
216 evolution of bet-hedging traits in which an allele causes the exaggeration of phenotypic noise  
217 among members of a lineage, thereby allowing a single genotype to spread environmental risk  
218 among different phenotypes that are suited to different environments (Fraser and Kaern 2009,  
219 Gillespie 1974, Kussell and Leibler 2005, Philippi and Seger 1989). Such a strategy is inherently  
220 dependent on selection favoring traits that confer a long-term benefit across a lineage, since  
221 individuals will experience differing fitness values depending on their phenotype and the  
222 environment they encounter. By spreading the risk of fitness losses under future environmental  
223 uncertainty across members of a lineage, bet-hedging helps to ensure survival and reproduction  
224 across the lineage as a whole, regardless of the environment. Examples of adaptive bet-hedging  
225 strategies have been noted in plants (Childs, et al. 2010, Clauss and Venable 2000, Gremer and

226 Venable 2014), insects (Hopper 1999, Menu, et al. 2000), and microbes (Balaban, et al. 2004,  
227 Jones and Lennon 2010, Levy, et al. 2012).

228

229 *Genetic interactions*

230

231 Alleles don't influence fitness alone but do so as part of an integrated genome. The genetic  
232 background of an allele is therefore another important source of variability in fitness across a  
233 lineage. Perhaps the most obvious example is that of epistasis (Phillips 1998), in which the  
234 fitness effect of a mutation depends on its genetic context. Empirical evidence suggests that  
235 epistasis among alleles is widespread (Costanzo, et al. 2016, Kryazhimskiy, et al. 2014, Wang, et  
236 al. 2014, Weinreich, et al. 2013) and therefore provides an important source of variability in the  
237 fitness effects of an allele, particularly in sexual populations. Similar variation in fitness can  
238 occur in asexual populations due to secondary mutations that arise on the genetic background of  
239 an allele as it spreads. This effect is most important in large populations or under high mutation  
240 rates. Such conditions lead to clonal interference (Gerrish and Lenski 1998), in which multiple  
241 asexual lineages carry competing beneficial mutations, thereby interfering with one another's  
242 fixation. The fate of a lineage under clonal interference cannot be decided by the selection  
243 coefficient of a single allele, but instead depends on the process of successive mutations  
244 accumulating along a series of competing asexual lineages (Desai and Fisher 2007, Lang, et al.  
245 2013). Indeed, this presents a major hurdle to evolving asexual populations, since the lack of  
246 recombination implies strict genetic linkage among mutations that occur on the same  
247 background. This lack of recombination can also lead to Muller's ratchet (Haigh 1978, Muller

248 1964), in which the serial fixation of deleterious mutations by genetic drift can cause fitness to  
249 erode along an asexual lineage.  
250  
251 The constraints on asexual adaptation due to clonal interference and Muller's ratchet provide  
252 strong arguments for why so many organismal life cycles include periods of recombination or  
253 sexual reproduction. These arguments are invariably related to the idea that alleles influencing  
254 sex can increase the long-term average evolutionary success of a lineage (Nunney 1999). This is  
255 because sex is inherently costly to individuals, who must invest time and energy in mating and  
256 further invest resources into the production of males, which are not capable of independent  
257 reproduction (Maynard Smith 1978). These costs could, however, be balanced if sex increases  
258 the long-term fitness of lineages (Nunney 1989, Nunney 1999). For example, under certain  
259 conditions of epistasis, recombination can accelerate both the pace of adaptation (Eshel and  
260 Feldman 1970) and the ability of populations to purge deleterious mutations and fend off  
261 Muller's ratchet (Kondrashov 1988). Furthermore, sexual reproduction can increase rates of  
262 adaptation by allowing beneficial mutations that arise on different backgrounds to be combined  
263 into a single genotype, thereby limiting the constraints imposed by clonal interference (Cooper  
264 2007, McDonald, et al. 2016). Finally, the red-queen hypothesis (Hamilton, et al. 1990, Van  
265 Valen 1973), asserts that the constant creation of new genotypes under recombination can allow  
266 organisms to more readily compete in a co-evolutionary arms race with parasites. Indeed, sex is  
267 likely to have evolved for a combination of reasons and empirical observations support many of  
268 the hypotheses that have been put forth (Colegrave 2002, Cooper 2007, Goddard, et al. 2005,  
269 McDonald, et al. 2016, Morran, et al. 2011).  
270

271 Sex and recombination are not the only processes that increase rates of adaptation. There has  
272 been substantial recent attention on whether natural selection can act more generally on the  
273 ability of populations to adapt, or its evolvability. Selection for evolvability is contentious, since  
274 the ability to adapt to future contingencies is a feature of populations and would therefore appear  
275 to require evolutionary foresight and group selection operating on biological populations (Lynch  
276 2007, Pigliucci 2008, Sniegowski and Murphy 2006, but see Watson and Szathmary 2016).  
277 However, traits that increase evolvability could also arise by the process of natural selection  
278 favoring traits that are beneficial on average, with lineages being more likely to persist over  
279 longer evolutionary periods if they are able to adapt to future conditions (Eshel 1973). While  
280 numerous traits could increase evolvability (Wagner and Altenberg 1996), there has been a great  
281 deal of attention paid to the evolution of alleles which influence the mutation rate – known as  
282 mutation rate modifiers (Denamur and Matic 2006, Sniegowski, et al. 2000). Mutation rate  
283 modifiers have been observed in microbial populations both in the lab (Sniegowski, et al. 1997)  
284 and in nature (LeClerc, et al. 1996, Matic, et al. 1997). The fate of such “mutator” alleles is  
285 intriguing, since they often arise without a direct effect on fitness themselves (Chao and Cox  
286 1983, Sniegowski, et al. 1997). In asexual populations, mutators are still physically linked to the  
287 mutations they produce and can thereby influence the statistical properties and long-term fate of  
288 lineages (Figure 1C). In such scenarios, evolvability arises as a by-product of indirect selection  
289 and genetic hitchhiking of mutators (Sniegowski and Murphy 2006). However, there are also  
290 notable exceptions in which histories of repeated environmental change could directly favor the  
291 evolution of traits that increase evolvability. This appears to be the case in pathogens, where  
292 elevated mutation rates in antigens to increase the capacity to adapt to a dynamic vertebrate  
293 immune response (Graves, et al. 2013, Moxon, et al. 1994).

294

295 *Social interactions*

296

297 Fitness is influenced not only by environmental and genetic factors but also by interactions with  
298 other conspecifics. These interactions can create a type of lineage-variable fitness known as  
299 frequency dependent selection, where the fitness effects of an allele are dependent on the  
300 frequency of the allele in the population. Frequency dependence is conveniently analyzed in the  
301 context of evolutionary game theory (Sidebar 3), which allows one to consider the ability of an  
302 initially rare allele to invade a population fixed for a wild-type allele (Maynard Smith 1982,  
303 Maynard Smith and Price 1973). This approach provides a generalization of the concept of a  
304 selection coefficient to instances where fitness cannot be wholly represented by a constant value.  
305 A classic example of frequency-dependent selection arises when considering cooperative traits.  
306 Here, cooperative acts incur a cost to individuals and are therefore susceptible to invasion by  
307 selfish “cheater” strategies that avoid the cost of cooperating while still reaping the benefit.  
308 Cheaters are typically beneficial when rare, since their fitness advantage requires interactions  
309 with other cooperators. Despite the inherent susceptibility to cheaters, cooperation is common in  
310 nature and is presumed to underlie major transitions in evolutionary history, such as the  
311 evolution of multicellularity (Szathmary and Maynard Smith 1995). The mechanisms promoting  
312 the evolution and maintenance of cooperation are therefore of long-standing interest to  
313 biologists.

314

315 Significant theoretical progress on the evolution of cooperation arose with the formulation of  
316 inclusive fitness theory. Hamilton (1964) showed that genes controlling cooperation may be

317 beneficial on average so long as the beneficiary of cooperative actions are kin, which are likely  
318 to share the genes controlling cooperation by common descent. The key realization of this theory  
319 is that cooperative acts need not directly increase the reproductive success of individual bearers,  
320 but instead must increase the average effect of a gene across the lineage of cooperators (Akçay  
321 and Van Cleve 2016). Cooperation can also be stable under cases of multi-level selection (Luo  
322 2014, Simon, et al. 2013, Traulsen and Nowak 2006). The formation and dissolution of new  
323 groups is itself a reproductive process and the long-term fate of a lineage is therefore sensitive to  
324 the influence of an allele on group-level reproduction (Figure 1D). A well-known example is  
325 infectious diseases, discussed below, in which individual cells or viral particles must replicate  
326 within hosts and also spread among hosts to establish new infections.

327

328 There is ample empirical evidence for the stability of cooperative traits in nature if selection  
329 favors traits that increase the long-term growth rate of a lineage at the expense of individual  
330 fitness. For example, a large number of studies have shown how cooperation, which appears  
331 costly to individuals, can prevail through the action of group selection and kin selection (Gore, et  
332 al. 2009, Koschwanez, et al. 2013, Rainey and Rainey 2003, Turner and Chao 1999, Velicer, et  
333 al. 2000). Perhaps more intriguing is the evolution of “policing” phenotypes that function to  
334 reduce the short-term benefits of selfish cheater phenotypes and thereby stabilize cooperation  
335 (Frank 1995, Nunney 1999, Travisano and Velicer 2004). For example, in social insects,  
336 reproduction by the worker caste constitutes a selfish trait that can undermine colony  
337 reproductive interests. To prevent selfish reproduction among workers, social insects have  
338 evolved anti-cheater strategies, where colony members will systematically destroy eggs laid by  
339 workers (Ratnieks and Visscher 1989). Tumor suppressor genes of multi-cellular organisms



340 perform a similar function by recognizing and destroying cells that violate normal growth  
341 regulation and thereby preventing outgrowths of genetically selfish cancer cells (Nunney 1999).  
342 Finally, group selection dynamics can even result in Simpson's paradox, in which the overall  
343 frequency of cooperators increases despite their systematic tendency to decrease within groups  
344 (Chuang, et al. 2009). The fact that a trait can spread even as it selects against in every individual  
345 carrier shows the potential for selection on long-term growth rate to prevail over selection on  
346 individuals.

347

#### 348 **IV. Limitations of fitness averages**

349

##### 350 *Limitations due to short-sighted selection*

351

352 A central theme in many of the treatments of lineage-variable fitness effects is that fitness  
353 differences can be averaged across a lineage using concepts like geometric mean fitness and  
354 inclusive fitness. These extended fitness averages provide a convenient way to determine if an  
355 allele has a positive or negative affect on a lineage- by instead determining whether it increases  
356 long-term the rate of spread of a lineage as a whole. We also note the equivalency between these  
357 concepts and several related averages that depict long-term growth rates. For example, pathogens  
358 are widely assumed to maximize their long-term transmission success,  $R_0$  (Alizon, et al. 2009,  
359 Anderson and May 1982). Similarly, Lyapunov exponents are sometimes used to derive long-  
360 term growth rates in variable environments (Kussell and Leibler 2005) and the concept of  
361 invasion fitness in evolutionary game theory (Sidebar 3) indicates whether natural selection tends  
362 to favor a trait under frequency dependence (Lehmann, et al. 2016). Similar averages have been

363 used to deal with variation in an allele's genetic background (Falconer 1994, Livnat and  
364 Papadimitriou 2016). In general, averages across the variability in reproductive success are  
365 meant to allow one to directly define an "effective" selection coefficient in order to identify  
366 which allele increases fitness. An even more ambitious goal would be to salvage Equation 1, as  
367 is the case under scenarios of rapid environmental change (Cvijović, et al. 2015).

368

369 Unfortunately, there are fundamental problems with the use of these averages that can preclude  
370 natural selection from maximizing fitness averages. Specifically, shortsighted selection can drive  
371 alleles to extinction, regardless of their long-term benefit to a lineage. This is most readily seen  
372 in the case of a changing environment (Figure 2), where it has been noted in several contexts  
373 (Cvijović, et al. 2015, Gerland and Hwa 2009, King and Masel 2007, Masel, et al. 2007).

374 Assume that a mutation arises in an environment in which it is beneficial and that the  
375 environment is constant for  $\tau$  generations. Provided it survives genetic drift, the allele will  
376 increase in frequency following a logistic function and reach a frequency of one in  
377 approximately  $2 \cdot \ln(Ns)/s$  generations (Desai and Fisher 2007). Thus, if  $\tau \gg 2 \cdot \ln(Ns)/s$ , then  
378 alleles will tend to arise and fix all in the same environment (Cvijović, et al. 2015). This provides  
379 a straightforward threshold, beyond which natural selection is blind to the allele's long-term  
380 benefit. Of course, this threshold is derived under the assumption of a well-mixed population of  
381 constant size, and other factors such as demographic changes and population subdivision could  
382 substantially extend this upper bound. Still, these considerations demonstrate an inherent time-  
383 constraint imposed by evolution in finite populations, which only disappear as a mathematical  
384 artifact in infinite populations (Figure 2C).

385

386 Similar limitations can be seen whenever the timescale of change in the fitness effects of an  
387 allele are greater than the time needed for natural selection to fix alleles conferring a short-term  
388 advantage. For example, models of multi-level selection become dominated by shortsighted  
389 selection of selfish phenotypes whenever group-level reproductive events are rare (Luo 2014).  
390 This breakdown in favor of shortsighted selection is analogous to that in variable environments  
391 (compare Figures 2B and 2D) and can be understood by considering the relative effects of  
392 individual and group selection on changes to allele frequency. Natural selection takes about  $s$   
393 generations to double the frequency of a selfish trait within groups, where  $s$  denotes the within-  
394 group benefit of a selfish trait. On the other hand, increased rates of group reproduction in groups  
395 of non-selfish individuals will double the frequency of a cooperative trait after approximately  $w \cdot r$   
396 generations, where  $r$  is the group-level selection coefficient and  $w$  is the number of individual  
397 generations between group reproductive events. This heuristic reasoning implies that  
398 shortsighted selection in favor of a selfish trait will dominate allele frequency changes and  
399 preclude the evolution of cooperation whenever  $s \gg w \cdot r$ , which very closely matches results  
400 derived by formal analysis (Luo 2014).

401

402 *Beyond fitness averages*

403

404 In addition to the role of extinction in tipping the outcome of selection toward shortsighted traits,  
405 studies explicitly modeling variability across a lineage have yielded a number of additional  
406 results that are not readily captured by Equation 1. Recently, Cvijović, et al. (2015) examined the  
407 case of a periodic environment that alternates between two states. An allele that is favored in one  
408 environment but disfavored in the next can follow unintuitive dynamics, particularly when large

409 changes in allele frequency occur within environmental epochs. In the classic, lineage-invariant  
410 scenario discussed above, fixation of a neutral allele from a single starting copy requires  
411 traversing from a starting frequency of  $1/N$  to a frequency of 1 by the action of genetic drift  
412 alone. In contrast, mutations in a fluctuating environment experience selective pressures  
413 continually, albeit of varying signs and intensities. This means that alleles can be driven to very  
414 high or very low frequencies by natural selection and then achieve fixation or loss due to genetic  
415 drift with far greater probability than predicted by Equation 1. This effect can cause the fixation  
416 probability of an allele to increase well beyond the neutral expectation of  $1/N$ , even when alleles  
417 are neutral or deleterious on average. Furthermore, natural selection becomes less efficient at  
418 recognizing long-term fitness effects- causing mutations to behave as though they were  
419 effectively neutral, even when they are beneficial or deleterious on average. Finally, as  
420 populations become smaller or swings in frequency more dramatic, fixation can become  
421 independent of the average selection coefficient, creating conditions where the fixation  
422 probability is not even a monotonically increasing function of long-term fitness.

423

424 Another intriguing result emerges when the mean reproductive success across a lineage is held  
425 constant but its variance is altered. For example, Gillespie (1974) considered a model meant to  
426 capture spatial variation in the environment by relaxing the assumption of a Poisson-distributed  
427 number of offspring. Gillespie found that the natural way to quantify fitness is  $w = \mu - \frac{1}{N} \sigma^2$   
428 where  $\mu$  is the mean number of offspring,  $\sigma^2$  is its variance, and  $N$  is the population size. A  
429 striking feature of this model is the appearance of population size in the definition of fitness,  
430 which suggests that the same allele can be favored or disfavored depending solely on the  
431 population size. This same sort of dependence on population size arises in a model of fluctuating

432 environments (Takahata, et al. 1975), as well as in mutators (André and Godelle 2006, Raynes, et  
433 al. 2014, Wylie, et al. 2009). We emphasize that the population size dependence in the above  
434 examples is distinct from that of Equation 1, where population size influences the efficiency of  
435 natural selection but does affect its sign. Instead, variability in fitness across a lineage makes it  
436 possible that a subset of individuals will experience strong selective pressures that are not  
437 dominated by drift, even in small populations. This implies that genetic drift and natural  
438 selection do not, in general, scale according the relationship in Equation 1.

439  
440 Perhaps the most intriguing feature of lineage variability is the possibility that the fate of an  
441 allele may not always be reducible to a selection coefficient at all. This is certainly the case for  
442 the evolution of mutation rate modifiers, where the succession of *de novo* beneficial and  
443 deleterious mutations results not only in variability in the distribution of offspring numbers  
444 across a lineage, but also in temporal autocorrelation in this distribution among the resulting sub-  
445 lineages (Figure 2C). Consequently, the offspring distribution is not only changing through time,  
446 but is also inherently linked to the underlying lineage dynamics. This implies that one is unable  
447 to define any selection coefficient for a mutator that predicts  $P_{\text{fix}}$ , but must instead derive  $P_{\text{fix}}$   
448 directly under models that explicitly capture the dynamics of secondary mutations and clonal  
449 interference (Good and Desai 2016). Although one could then use  $P_{\text{fix}}$  to retrospectively define  
450 an effective coefficient for any given population size using Equation 1 (Wylie, et al. 2009), it  
451 seems that one cannot generally define such a selection coefficient *a priori*. Moreover, even  
452 given such an effective selection coefficient, true  $P_{\text{fix}}$  doesn't scale with  $N$  in the manner  
453 predicted by Equation 1 (Good and Desai 2016). It remains to be seen whether a similar inability

454 to reduce lineage fate to any effective selection coefficient might emerge in the context of  
455 variable environments and other examples of lineage-variable fitness effects.

456

## 457 **V. Implications for infectious disease evolution**

458

459 One of the most promising applications of models considering lineage-variable fitness effects is  
460 in predicting and controlling the evolution of infectious diseases. Medically important traits such  
461 as pathogen virulence and drug resistance evolve rapidly and there has been considerable interest  
462 in the development of evolution-proof vaccines and antibiotics (Allen, et al. 2014, Day and Read  
463 2016, Huijben, et al. 2013, Read, et al. 2011). Pathogen lineages experience a variety of extrinsic  
464 environmental changes including a dynamic immune response, a diverse set of tissues and hosts,  
465 and varying exposure to drugs. Additionally, since reproduction occurs both within and between  
466 hosts, multi-level selection can create conflicting selective pressures operating over different  
467 timescales (Kawashima, et al. 2009, Levin and Bull 1994). Finally, the dynamic immune  
468 response targeting antigenic epitopes has resulted in the selective pressures favoring mutator  
469 genes capable of immune evasion and antigenic evolvability (Deitsch, et al. 2009, Graves, et al.  
470 2013, Moxon, et al. 1994). Variability across lineages therefore appears to be the rule rather than  
471 the exception in infectious disease evolution.

472

473 Predicting pathogen evolution and designing evolution-proof drugs will be greatly aided by  
474 models that combine the various selective pressures operating at different levels and timescales  
475 during the pathogen life-cycle. Traditional models have generally assumed that natural selection  
476 will favor traits that increase the long-term epidemiological success. For example, virulence is

477 widely regarded as an adaptation to balance the increased rate of transmission by more  
478 aggressive diseases with the reduced duration of infection caused by host mortality or immune  
479 selection (Alizon, et al. 2009, Alizon and Michalakis 2015, Anderson and May 1982, Bull and  
480 Lauring 2014). However, the assumption that natural selection will maximize transmission  
481 success is analogous to selection maximizing other long-term measures of lineage success, like  
482 geometric mean fitness, and is therefore sensitive to the limitations discussed above (Figure 2).  
483 Specifically, shortsighted selection occurring within-hosts may act as a barrier for traits that  
484 could increase long-term transmission success (Levin and Bull 1994; Sidebar 2). Indeed, models  
485 that include mutation or competition between strains within-hosts or other ecological dynamics  
486 have demonstrated the inability of selection to maximize transmission success (Alizon, et al.  
487 2013, Bonhoeffer and Nowak 1994, Day 2003).

488  
489 There is broad support for the prediction that shortsighted selection and selection acting to  
490 increase traits that are beneficial on average can interact to shape infectious disease traits. For  
491 example, empirical studies in HIV (Alizon and Fraser 2013) and enteric bacteria (Giraud, et al.  
492 2001) show how short-sighted selection can dominate patterns of evolution and lead to  
493 reductions in long-term transmission success. In *Salmonella enterica*, the need to maintain costly  
494 virulence factors that are susceptible to short-sighted selection for cheaters appears to have  
495 favored a strategy of cheater prevention that help to stabilize long-term infectivity (Diard, et al.  
496 2013, Frank 2013, Mulder and Coombs 2013). Further theoretical progress on the role of  
497 interaction between the differing timescales of selection in pathogens could come from models  
498 that explicitly combine mechanistic within-host processes with long-term epidemiological  
499 dynamics (Coombs, et al. 2007, Day and Gandon 2007, Gilchrist and Coombs 2006, Mideo, et

500 al. 2008). In addition, new experimental technologies such as lineage tracking of pathogens using  
501 barcode deep-sequencing (Blundell and Levy 2014, Levy, et al. 2015) offer exciting  
502 opportunities to measure selective pressures occurring within-hosts and integrate them with more  
503 traditional epidemiological data.

504

## 505 **VI. Conclusions**

506

507 Despite historical emphasis on individual fitness effects shaping the fate of an allele, such a  
508 measure of fitness cannot always capture long-term evolutionary behavior when variability in  
509 fitness effects arise due to environmental, genetic or social interactions (Table 1, Figure 1). In  
510 some cases, averaging lineage-variable fitness across the various environmental, genetic, and  
511 social contexts an allele encounters allows for the application of classical population genetics  
512 results based on traditional notions of fitness related to individual survival and reproduction.  
513 However, this approach can fail in finite populations where an allele's predicted fate can be  
514 interrupted by fixation or extinction due to shortsighted selection (Figure 2B). Furthermore,  
515 genetic drift and natural selection interact in unexpected ways when variability in fitness effects  
516 occurs over a comparable timescale to allele frequency (Cvijović et al. 2015, Figure 2D). More  
517 strikingly, examples from studies of mutation rate modifiers indicate that there may be no way to  
518 summarize the direction of natural selection on an allele without simply modeling its long-term  
519 lineage dynamics (Good and Desai 2016). Taken together, these findings may have particular  
520 relevance for the study of infectious pathogens, where alleles are likely to experience variability  
521 due to a combination of environmental, genetic, and social interactions.

522



523 Variability in the fitness effects of an allele challenge the conventional premise of population  
524 genetics that individual offspring number can be drawn from a fixed distribution for all members  
525 of a lineage (Figure 1). Cases where the typical assumption of a Poisson offspring distribution  
526 have been relaxed (Gillespie 1974) have yielded intriguing new evolutionary properties such as  
527 dependence on both the mean and variance in fitness effects and a critical effect of population  
528 size in determining whether an allele is beneficial. Other examples allow properties of the  
529 offspring distribution to vary in time, but still assume that the form of the distribution is fixed  
530 (Cvijović, et al. 2015). In yet other cases, it appears that allele frequency dynamics cannot  
531 always be reduced to one of independent draws from any offspring distribution, time-dependent  
532 or not. This effect is most recognizable in mutators, where the offspring distribution changes in a  
533 manner that is inseparable from the underlying lineage dynamics caused by secondary mutations  
534 and selection on sub-lineages (Figure 1C). Thus, while theoretical progress has been made in  
535 understanding processes where the offspring distribution takes on more general forms (Cannings  
536 1974, Der, et al. 2011), we are still far from a population genetics theory with which to predict  
537 the fate of an allele in general scenarios of lineage-variable fitness effects.

538

539 Lineage variability also highlights the need for caution when interpreting the adaptive  
540 significance of biological traits in nature. Emphasis has often been placed on individual fitness  
541 effects at the expense of neglecting the ability of selection to favor traits that have longer term  
542 consequences on the fate of an allele (Williams 1966). Indeed, there are a plurality of definitions  
543 of fitness (Orr 2009) with each generalizing the concept of fitness under a particular source of  
544 lineage variability but none that appear sufficiently general to account for all examples. Caution  
545 is warranted when considering traits in the context of their long-term effects on a lineage, since

546 such traits are inherently susceptible to shortsighted selection (Figure 2). Thus, while it is often  
547 safe to assume that selection will favor traits on the basis of extended fitness metrics, it is also  
548 important to consider the inherent limitations in the ability of natural selection to optimize any  
549 measure of fitness.

550

## 551 **Acknowledgements**

552

553 The authors gratefully acknowledge Erol Akçay, Michael Desai, Steven A. Frank, Joanna Masel,  
554 Paul Rainey, Richard Watson, Eugene Raynes and other members of the Weinreich lab for  
555 numerous constructive comments on an earlier draft. C.J.G. is supported in part by NSF  
556 Graduate Research Fellowship 1644760, NSF 1501355 and NSF DGE 0966060. D.M.W.  
557 supported in part by NSF DEB-1556300 and NIH R01GM095728.

558

559

560 **Literature cited**

561

562 Akçay E, Van Cleve J. 2016. There is no fitness but fitness, and the lineage is its bearer. *Philos.*  
563 *Trans. R. Soc. Lond., B, Biol. Sci.* 371: 20150085

564

565 Alizon S, de Roode JC, Michalakis Y. 2013. Multiple infections and the evolution of virulence.  
566 *Ecol. Lett.* 16: 556-67

567

568 Alizon S, Fraser C. 2013. Within-host and between-host evolutionary rates across the HIV-1  
569 genome. *Retrovirology* 10: 49

570

571 Alizon S, Hurford A, Mideo N, Van Baalen M. 2009. Virulence evolution and the trade-off  
572 hypothesis: history, current state of affairs and the future. *J. Evol. Biol.* 22: 245-59

573

574 Alizon S, Michalakis Y. 2015. Adaptive virulence evolution: the good old fitness-based  
575 approach. *Trends Ecol. Evol.* 30: 248-54

576

577 Allen RC, Popat R, Diggle SP, Brown SP. 2014. Targeting virulence: can we make evolution-  
578 proof drugs? *Nature Rev. Microbiol.* 12: 300-08

579

580 Anderson RM, May RM. 1982. Coevolution of hosts and parasites. *Parasitology* 85 (Pt 2): 411-

581 26

582

- 583 André J-B, Godelle B. 2006. The Evolution of Mutation Rate in Finite Asexual Populations.  
584 *Genetics* 172: 611-26  
585
- 586 Balaban NQ, Merrin J, Chait R, Kowalik L, Leibler S. 2004. Bacterial persistence as a  
587 phenotypic switch. *Science* 305: 1622-5  
588
- 589 Blundell JR, Levy SF. 2014. Beyond genome sequencing: Lineage tracking with barcodes to  
590 study the dynamics of evolution, infection, and cancer. *Genomics* 104: 417-30  
591
- 592 Bonhoeffer S, Nowak MA. 1994. Mutation and the Evolution of Virulence. *Proc. R. Soc. B* 258:  
593 133-40  
594
- 595 Bull JJ, Luring AS. 2014. Theory and empiricism in virulence evolution. *PLoS Pathog.* 10:  
596 e1004387  
597
- 598 Cannings C. 1974. The latent roots of certain Markov chains arising in genetics: a new approach,  
599 I. Haploid models. *Adv. Appl. Probab.* 6: 260-90  
600
- 601 Chao L, Cox EC. 1983. Competition between high and low mutating strains of *Escherichia coli*.  
602 *Evolution* 37: 125-34  
603
- 604 Childs DZ, Metcalf C, Rees M. 2010. Evolutionary bet-hedging in the real world: empirical  
605 evidence and challenges revealed by plants. *Proc. R. Soc. B* 277: 3055-64

- 606
- 607 Chuang JS, Rivoire O, Leibler S. 2009. Simpson's Paradox in a Synthetic Microbial System.
- 608 *Science* 323: 272-75
- 609
- 610 Clauss M, Venable D. 2000. Seed germination in desert annuals: an empirical test of adaptive bet
- 611 hedging. *Am. Nat.* 155: 168-86
- 612
- 613 Colegrave N. 2002. Sex releases the speed limit on evolution. *Nature* 420: 664-66
- 614
- 615 Coombs D, Gilchrist MA, Ball CL. 2007. Evaluating the importance of within- and between-host
- 616 selection pressures on the evolution of chronic pathogens. *Theor. Popul. Biol.* 72: 576-91
- 617
- 618 Cooper TF. 2007. Recombination speeds adaptation by reducing competition between beneficial
- 619 mutations in populations of *Escherichia coli*. *PLoS biology* 5: e225
- 620
- 621 Costanzo M, VanderSluis B, Koch EN, Baryshnikova A, Pons C, et al. 2016. A global genetic
- 622 interaction network maps a wiring diagram of cellular function. *Science* 353: aaf1420
- 623
- 624 Cvijović I, Good BH, Jerison ER, Desai MM. 2015. Fate of a mutation in a fluctuating
- 625 environment. *Proc. Natl. Acad. Sci. USA* 112: E5021-E28
- 626
- 627 Day T. 2003. Virulence evolution and the timing of disease life-history events. *Trends Ecol.*
- 628 *Evol.* 18: 113-18

629

630 Day T, Gandon S. 2007. Applying population-genetic models in theoretical evolutionary

631 epidemiology. *Ecol. Lett.* 10: 876-88

632

633 Day T, Read AF. 2016. Does high-dose antimicrobial chemotherapy prevent the evolution of

634 resistance? *PLoS Comput. Biol.* 12: e1004689

635

636 Deitsch KW, Lukehart SA, Stringer JR. 2009. Common strategies for antigenic variation by

637 bacterial, fungal and protozoan pathogens. *Nature Rev. Microbiol.* 7: 493-503

638

639 Dempster ER. 1955. Maintenance of genetic heterogeneity. *Cold Spring Harb. Symp. Quant.*

640 *Biol.* 20: 25-31

641

642 Denamur E, Matic I. 2006. Evolution of mutation rates in bacteria. *Mol. Microbiol.* 60: 820-27

643

644 Der R, Epstein CL, Plotkin JB. 2011. Generalized population models and the nature of genetic

645 drift. *Theor. Popul. Biol.* 80: 80-99

646

647 Desai MM, Fisher DS. 2007. Beneficial mutation selection balance and the effect of linkage on

648 positive selection. *Genetics* 176: 1759-98

649

650 Diard M, Garcia V, Maier L, Remus-Emsermann MNP, Regoes RR, et al. 2013. Stabilization of

651 cooperative virulence by the expression of an avirulent phenotype. *Nature* 494: 353-56

652

653 Eshel I. 1973. Clone-Selection and Optimal Rates of Mutation. *J Appl. Probab.* 10: 728-38

654

655 Eshel I, Feldman MW. 1970. On the evolutionary effect of recombination. *Theor. Popul. Biol.* 1:

656 88-100

657

658 Eshel I, Feldman MW, Bergman A. 1998. Long-term Evolution, Short-term Evolution, and

659 Population Genetic Theory. *Journal of Theoretical Biology* 191: 391-96

660

661 Falconer DS. 1994. *Introduction to Quantitative Genetics*. Essex, England: Longman Scientific

662 and Technical. 438 pp.

663

664 Frank SA. 1995. Mutual policing and repression of competition in the evolution of cooperative

665 groups. *Nature* 377: 520-22

666

667 Frank SA. 2013. Microbial Evolution: Regulatory Design Prevents Cancer-like Overgrowths.

668 *Curr. Biol.* 23: R343-R46

669

670 Frank SA, Slatkin M. 1990. Evolution in a variable environment. *Am. Nat.* 136: 244-60

671

672 Fraser D, Kaern M. 2009. A chance at survival: gene expression noise and phenotypic

673 diversification strategies. *Mol Microbiol* 71: 1333-40

674

- 675 Gerland U, Hwa T. 2009. Evolutionary selection between alternative modes of gene regulation.  
676 *Proc. Natl. Acad. Sci. USA* 106: 8841-46  
677
- 678 Gerrish PJ, Lenski RE. 1998. The fate of competing beneficial mutations in an asexual  
679 population. *Genetica* 102: 127  
680
- 681 Gilchrist MA, Coombs D. 2006. Evolution of virulence: interdependence, constraints, and  
682 selection using nested models. *Theor. Popul. Biol.* 69: 145-53  
683
- 684 Gillespie JH. 1973. Natural selection with varying selection coefficients—a haploid model. *Genet.*  
685 *Res.* 21: 115-20  
686
- 687 Gillespie JH. 1974. Natural selection for within-generation variance in offspring number.  
688 *Genetics* 76: 601-06  
689
- 690 Giraud A, Matic I, Tenaillon O, Clara A, Radman M, et al. 2001. Costs and benefits of high  
691 mutation rates: adaptive evolution of bacteria in the mouse gut. *Science* 291: 2606-8  
692
- 693 Goddard MR, Godfray HCJ, Burt A. 2005. Sex increases the efficacy of natural selection in  
694 experimental yeast populations. *Nature* 434: 636-40  
695
- 696 Good BH, Desai MM. 2016. Evolution of Mutation Rates in Rapidly Adapting Asexual  
697 Populations. *Genetics* 204: 1249-66



698

699 Gore J, Youk H, Van Oudenaarden A. 2009. Snowdrift game dynamics and facultative cheating  
700 in yeast. *Nature* 459: 253-56

701

702 Graves CJ, Ros VI, Stevenson B, Sniegowski PD, Brisson D. 2013. Natural selection promotes  
703 antigenic evolvability. *PLoS Pathog.* 9: e1003766

704

705 Gremer JR, Venable DL. 2014. Bet hedging in desert winter annual plants: optimal germination  
706 strategies in a variable environment. *Ecol. Lett.* 17: 380-7

707

708 Haigh J. 1978. The accumulation of deleterious genes in a population—Muller's Ratchet. *Theor.*  
709 *Popul. Biol.* 14: 251-67

710

711 Haldane JBS. 1927. A mathematical theory of natural and artificial selection. Part V: Selection  
712 and mutation. *Proc. Camb. Phil. Soc* 23: 838-44

713

714 Hamilton WD. 1964. The genetical evolution of social behaviour. I. *Theor. Popul. Biol.* 7: 1-16

715

716 Hamilton WD, Axelrod R, Tanese R. 1990. Sexual reproduction as an adaptation to resist  
717 parasites (a review). *Proc. Natl. Acad. Sci. USA* 87: 3566-73

718

719 Hopper KR. 1999. Risk-spreading and bet-hedging in insect population biology 1. *Annu. Rev.*  
720 *Entomol.* 44: 535-60

721

722 Huijben S, Bell AS, Sim DG, Tomasello D, Mideo N, et al. 2013. Aggressive chemotherapy and  
723 the selection of drug resistant pathogens. *PLoS Pathog* 9: e1003578

724

725 Jones SE, Lennon JT. 2010. Dormancy contributes to the maintenance of microbial diversity.  
726 *Proc Natl Acad Sci U S A* 107: 5881-6

727

728 Kawashima Y, Pfafferott K, Frater J, Matthews P, Payne R, et al. 2009. Adaptation of HIV-1 to  
729 human leukocyte antigen class I. *Nature* 458: 641-45

730

731 Kimura M. 1962. On the probability of fixation of mutant genes in a population. *Genetics* 47:  
732 713-19

733

734 King OD, Masel J. 2007. The evolution of bet-hedging adaptations to rare scenarios. *Theor.*  
735 *Popul. Biol.* 72: 560-75

736

737 Kondrashov AS. 1988. Deleterious mutations and the evolution of sex. *Nature* 336: 435-40

738

739 Koschwanez JH, Foster KR, Murray AW. 2013. Improved use of a public good selects for the  
740 evolution of undifferentiated multicellularity. *eLife* 2: e00367

741

742 Kryazhimskiy S, Rice DP, Jerison ER, Desai MM. 2014. Global epistasis makes adaptation  
743 predictable despite sequence-level stochasticity. *Science* 344: 1519-22

744

745 Kussell E, Leibler S. 2005. Phenotypic Diversity, Population Growth, and Information in  
746 Fluctuating Environments. *Science* 309: 2075-78

747

748 Lang GI, Rice DP, Hickman MJ, Sodergren E, Weinstock GM, et al. 2013. Pervasive genetic  
749 hitchhiking and clonal interference in forty evolving yeast populations. *Nature* 500: 571-  
750 4

751

752 LeClerc JE, Li B, Payne WL, Cebula TA. 1996. High mutation frequencies among *Escherichia*  
753 *coli* and *Salmonella* pathogens. *Science* 274: 1208

754

755 Lehmann L, Mullon C, Akçay E, Van Cleve J. 2016. Invasion fitness, inclusive fitness, and  
756 reproductive numbers in heterogeneous populations. *Evolution* 70: 1689-702

757

758 Levin BR, Bull JJ. 1994. Short-sighted evolution and the virulence of pathogenic  
759 microorganisms. *Trends in Microbiology* 2: 76-81

760

761 Levins R. 1968. *Evolution in changing environments: Some theoretical explorations*. Princeton,  
762 NJ: Princeton University Press. 120 pp.

763

764 Levy SF, Blundell JR, Venkataram S, Petrov DA, Fisher DS, Sherlock G. 2015. Quantitative  
765 evolutionary dynamics using high-resolution lineage tracking. *Nature* 519: 181-+

766

- 767 Levy SF, Ziv N, Siegal ML. 2012. Bet hedging in yeast by heterogeneous, age-correlated  
768 expression of a stress protectant. *PLoS Biol.* 10: e1001325  
769
- 770 Lewontin RC, Cohen D. 1969. On population growth in a randomly varying environment. *Proc.*  
771 *Natl. Acad. Sci. USA* 62: 1056-60  
772
- 773 Livnat A, Papadimitriou CH. 2016. Sex as an Algorithm: The Theory of Evolution Under the  
774 Lens of Computation. *Commun. ACM* 59: 84-93  
775
- 776 Luo S. 2014. A unifying framework reveals key properties of multilevel selection. *Theor. Popul.*  
777 *Biol.* 341: 41-52  
778
- 779 Lynch M. 2007. The frailty of adaptive hypotheses for the origins of organismal complexity.  
780 *Proc. Natl. Acad. Sci. USA* 104: 8597-604  
781
- 782 Masel J, King Oliver D, Maughan H. 2007. The Loss of Adaptive Plasticity during Long Periods  
783 of Environmental Stasis. *Am. Nat.* 169: 38-46  
784
- 785 Matic I, Radman M, Taddei F, Picard B, Doit C, et al. 1997. Highly variable mutation rates in  
786 commensal and pathogenic *Escherichia coli*. *Science* 277: 1833-34  
787
- 788 Maynard Smith J. 1964. Group Selection and Kin Selection. *Nature* 201: 1145-47  
789

- 790 Maynard Smith J. 1978. *The evolution of sex*: Cambridge Univ Press
- 791
- 792 Maynard Smith J. 1982. *Evolution and the Theory of Games*: Cambridge Univ Press
- 793
- 794 Maynard Smith J, Price G. 1973. The logic of animal conflict. *Nature* 246: 15
- 795
- 796 McDonald MJ, Rice DP, Desai MM. 2016. Sex speeds adaptation by altering the dynamics of
- 797 molecular evolution. *Nature* 531: 233-36
- 798
- 799 Menu F, Roebuck J-P, Viala M. 2000. Bet-hedging diapause strategies in stochastic
- 800 environments. *Am. Nat.* 155: 724-34
- 801
- 802 Meyers LA, Bull JJ. 2002. Fighting change with change: adaptive variation in an uncertain
- 803 world. *Trends Ecol. Evol.* 17: 551-57
- 804
- 805 Mideo N, Alizon S, Day T. 2008. Linking within- and between-host dynamics in the
- 806 evolutionary epidemiology of infectious diseases. *Trends Ecol. Evol.* 23: 511-7
- 807
- 808 Morran LT, Schmidt OG, Gelarden IA, Parrish RC, Lively CM. 2011. Running with the Red
- 809 Queen: host-parasite coevolution selects for biparental sex. *Science* 333: 216-18
- 810
- 811 Moxon ER, Rainey PB, Nowak MA, Lenski RE. 1994. Adaptive evolution of highly mutable
- 812 loci in pathogenic bacteria. *Curr. Biol.* 4: 24-33

813

814 Mulder DT, Coombes BK. 2013. Infection biology: Cheats never prosper. *Nature* 494: 321-22

815

816 Muller HJ. 1964. The relation of recombination to mutational advance. *Mutat. Res.* 106: 2-9

817

818 Nunney L. 1989. The Maintenance of Sex by Group Selection. *Evolution* 43: 245-57

819

820 Nunney L. 1999. Lineage selection and the evolution of multistage carcinogenesis. *Proc. R. Soc.*

821 *B* 266: 493-98

822

823 Nunney L. 1999. Lineage selection: natural selection for long-term benefit. In *Levels of selection*

824 *in evolution*, ed. L Keller, pp. 238-52. Princeton, NJ: Princeton University Press

825

826 Orr HA. 2009. Fitness and its role in evolutionary genetics. *Nature Rev. Genet.* 10: 531-9

827

828 Philippi T, Seger J. 1989. Hedging one's evolutionary bets, revisited. *Trends Ecol. Evol.* 4: 41-4

829

830 Phillips PC. 1998. The language of gene interaction. *Genetics* 149: 1167-71

831

832 Pigliucci M. 2008. Is evolvability evolvable? *Nature Rev. Genet.* 9: 75-82

833

834 Rainey PB, Rainey K. 2003. Evolution of cooperation and conflict in experimental bacterial

835 populations. *Nature* 425: 72-74

836

837 Ratnieks FL, Visscher PK. 1989. Worker policing in the honeybee. *Nature* 342: 796-97

838

839 Raynes Y, Halstead AL, Sniegowski PD. 2014. The effect of population bottlenecks on mutation  
840 rate evolution in asexual populations. *J. Evol. Biol.* 27: 161-69

841

842 Read AF, Day T, Huijben S. 2011. The evolution of drug resistance and the curious orthodoxy of  
843 aggressive chemotherapy. *Proc. Natl. Acad. Sci. USA* 108: 10871-77

844

845 Simon B, Fletcher JA, Doebeli M. 2013. Towards a general theory of group selection. *Evolution*  
846 67: 1561-72

847

848 Sniegowski PD, Gerrish PJ, Johnson T, Shaver A. 2000. The evolution of mutation rates:  
849 separating causes from consequences. *Bioessays* 22: 1057-66

850

851 Sniegowski PD, Gerrish PJ, Lenski RE. 1997. Evolution of high mutation rates in experimental  
852 populations of *E. coli*. *Nature* 387: 703-05

853

854 Sniegowski PD, Murphy HA. 2006. Evolvability. *Curr. Biol.* 16: R831-R34

855

856 Stearns SC. 2000. Daniel Bernoulli (1738): evolution and economics under risk. *J. Biosci.* 25:  
857 221-8

858

- 859 Szathmary E, Maynard Smith J. 1995. The major evolutionary transitions. *Nature* 374: 227-32  
860
- 861 Takahata N, Ishii K, Matsuda H. 1975. Effect of temporal fluctuation of selection coefficient on  
862 gene frequency in a population. *Proc. Natl. Acad. Sci. USA* 72: 4541-45  
863
- 864 Traulsen A, Hauert C. 2009. Stochastic evolutionary game dynamics. In *Reviews of nonlinear*  
865 *dynamics and complexity*, ed. HG Schuster, pp. 25-61. Weinheim, Germany: Wiley-VCH  
866 Verlag GmbH & Co.  
867
- 868 Traulsen A, Nowak MA. 2006. Evolution of cooperation by multilevel selection. *Proc. Natl.*  
869 *Acad. Sci. USA* 103: 10952-55  
870
- 871 Travisano M, Velicer GJ. 2004. Strategies of microbial cheater control. *Trends Microbiol.* 12:  
872 72-78  
873
- 874 Turner PE, Chao L. 1999. Prisoner's dilemma in an RNA virus. *Nature* 398: 441-43  
875
- 876 Van Valen L. 1973. A new evolutionary law. *Evolutionary theory* 1: 1-30  
877
- 878 Velicer GJ, Kroos L, Lenski RE. 2000. Developmental cheating in the social bacterium  
879 *Myxococcus xanthus*. *Nature* 404: 598-601  
880



- 881 Via S, Gomulkiewicz R, De Jong G, Scheiner SM, Schlichting CD, Van Tienderen PH. 1995.  
882 Adaptive phenotypic plasticity: consensus and controversy. *Trends Ecol. Evol.* 10: 212-7  
883
- 884 Wagner GP, Altenberg L. 1996. Perspective: Complex adaptations and the evolution of  
885 evolvability. *Evolution* 50: 967-76  
886
- 887 Wang X, Fu AQ, Mc Nerney ME, White KP. 2014. Widespread genetic epistasis among cancer  
888 genes. *Nature communications* 5  
889
- 890 Watson RA, Szathmáry E. 2016. How Can Evolution Learn? *Trends in Ecology & Evolution* 31:  
891 147-57  
892
- 893 Weinreich DM, Lan Y, Wylie CS, Heckendorn RB. 2013. Should Evolutionary Geneticists  
894 Worry about High Order Epistasis? *Current Opinion in Development and Genetics* 23:  
895 700-07  
896
- 897 Williams GC. 1966. *Adaptation and natural selection: A critique of some current evolutionary*  
898 *thought*. Princeton university press  
899
- 900 Wylie CS, Ghim CM, Kessler DA, Levine H. 2009. The fixation probability of rare mutators in  
901 finite asexual populations. *Genetics* 181: 1595-602  
902  
903

904 *Sidebar 1 – What is a lineage? (Typeset near ‘Introduction’)*

905 We define a lineage as the full genealogy of descendent copies of an allele starting from the  
906 original copy and ending at its long-term fate: extinction, fixation, or maintenance as a stable  
907 polymorphism in the population. A traditional approach in population genetics has been to  
908 describe the long-term evolutionary fate of a mutant allele influencing some biological trait  
909 under the combined influence of evolutionary processes like mutation, genetic drift, migration,  
910 and natural selection. Using analytical approaches from stochastic process theory, this work  
911 seeks to calculate the probability that such an allele ultimately reaches a frequency of one, or  
912 achieves fixation, in the population. This approach places emphasis not solely on the individual  
913 reproductive process but also on the long-term fate of a genetic lineage carrying the mutation. It  
914 therefore captures a much larger class of phenomena where fitness may not be directly affected  
915 among individual carriers of an allele but the allele instead influences the statistical properties of  
916 a lineage (Wylie, et al. 2009). Our focus will be primarily on lineage of asexual haploid lineages,  
917 which are easier to analyze and depict. However, the approach and definition of a lineage given  
918 here extends naturally to sexual diploid organisms.

919

920 *Sidebar 2 – Geometric mean fitness (Typeset near beginning of ‘Lineage-Variable Fitness*  
921 *Effects’)*

922 A widely appreciated result regarding adaptations to varying environments is the principle that  
923 natural selection will favor traits based on their geometric mean fitness. When reproductive  
924 success changes between generations, natural selection favors traits that increase the long-term  
925 geometric mean fitness (GMF). Reflecting the multiplicative nature of reproduction, GMF is the  
926 product of fitness in each generation, raised to the reciprocal of the number of generations.

927 Algebraically,  $GMF = (\prod_{t=1}^n w_t)^{1/n}$ , where  $w_t$  is the Wrightian fitness of a trait in generation  $t$ .

928 The same quantity can be expressed as a linear average over the natural log of this fitness value,

929  $GMF = \exp \left[ \frac{1}{n} \sum_{t=1}^n \ln (w_t) \right]$ . In practice, approximations are used such as  $GMF \approx \mu - \sigma^2/\mu$ ,

930 where  $\mu$  is the arithmetic mean fitness and  $\sigma^2$  is the variance in fitness. This formula explicates  
931 the fact that natural selection favors increases in mean fitness, but also decreases in the variance  
932 of fitness. This implies that natural selection can be risk averse, favoring alleles with lower  
933 variance in fitness even at the expense of decreasing fitness on average.

934

935 *Sidebar 3 – Evolutionary game theory (Typeset near end of ‘Lineage-Variable Fitness Effects’ or*  
936 *beginning of ‘Limitations of Fitness averages’)*

937

938 Evolutionary game theory (Maynard Smith 1982) analyzes an interaction among a set of  
939 competing alleles or “strategies” and summarizes their effect in a matrix representing the fitness  
940 payoff of all pairwise competitions among competitors. Such a framework is most useful in the  
941 context of frequency dependent selection, where the fitness effects of an allele are not easily  
942 summarized by a constant selection coefficient. Such a framework provides a natural way to  
943 determine whether a new allele starting from a single copy will tend to increase in frequency or  
944 “invade” a population that is fixed for an alternative allele. This leads to the concept of an  
945 evolutionarily stable strategy or ESS, which is defined as a strategy or allele that cannot be  
946 invaded by any alternative strategy starting at an initially small frequency. The ability of an allele  
947 to invade, or invasion fitness, is a generalization of the notion of a selection coefficient to the  
948 case of frequency dependent selection and describes the long-term stability of a mutation against  
949 other competing mutations (Eshel, et al. 1998, Lehmann, et al. 2016). While there are notable  
950 exceptions (Traulsen and Hauert 2009, Traulsen and Nowak 2006), game theoretic models are  
951 typically deterministic and describe the central tendency for allele frequency change but not the  
952 statistical properties of lineages in finite populations.

953 **Glossary of terms** (*To appear adjacent to first use of each term or phrase*)

954

955 **Lineage-variable fitness effects:** Differing fitness effects of an allele between individuals due to  
956 genetic, social, or environmental interactions.

957

958 **Offspring distribution:** A discrete probability distribution that captures the stochasticity in an  
959 individual organism's reproductive success.

960

961 **Cheater:** An individual that benefits from cooperative interactions of other individuals without  
962 itself contributing to the cost of cooperating.

963

964 **Frequency dependent selection:** A model in which the fitness of an allele depends on its  
965 frequency in the population as a consequence of interactions between organisms.

966

967 **Epistasis:** The phenotypic effect of a mutation varies with genetic context.

968

969 **Modifier loci:** Loci responsible for genetic properties of a genome, such as mutation rate,  
970 recombination rate and mutational robustness.

971

972 **Indirect selection:** Selection acting on a modifier locus mediated by genetic linkage with fitness  
973 effects at other loci in the genome.

974

975 **Clonal interference:** Competition between mutational independent asexual lineages, each  
976 carrying one or more beneficial mutations.

977

978 **Genetic drift:** Stochastic variation in allele frequency as a consequence of stochasticity in  
979 reproduction inherent in finite populations.

980

981

982 **Figure Captions**

983

984 **Figure 1. Variability in fitness across a lineage in diverse models.** A large number of realistic  
985 biological scenarios can result in the presence of variation in fitness across a lineage either  
986 among contemporary individuals (vertical axis) or between individuals in time (horizontal axis).  
987 Genealogies are shown for two competing allelic lineages indicated by circles. The focal lineage  
988 is shaded yellow and the wild-type lineage is shaded black. Curves on the bottom of each panel  
989 depict changes to the mean (blue) and variance (orange) of fitness across the focal lineage. **A.**  
990 Lineage carrying a beneficial allele (yellow) rising to fixation under the classical scenario of  
991 lineage invariance. **B.** Lineage carrying an allele that alternates from beneficial to deleterious in  
992 a variable environment. Contemporary individuals share an identical fitness, and hence an  
993 identical selection coefficient, but this quantity changes over time. **C.** Evolution of a mutator  
994 lineage that experiences increased rates of both deleterious (red dots) and beneficial (grey  
995 background) mutations. **D.** A cooperative lineage under a group selection model. Within-group  
996 selective pressures cause the allele to be disfavored over short timescales. Groups with more  
997 cooperative alleles tend to displace other groups over longer timescales (shown with solid grey  
998 lines). In both **C** and **D**, fitness in the lineage varies both among contemporary individuals and  
999 over time.

1000

1001 **Figure 2. Limitations of fitness averages in finite populations.** Evolution in a periodic  
1002 environment results in four distinct regimes characterized by the relative timescale of natural  
1003 selection ( $1/s$ ) and environmental change ( $\tau$ ). Simulation results of the model described by  
1004 Cvijović et al. (2015) are shown in blue and the expected change of an allele with the same  
1005 average fitness effect in a constant environment is shown in red. Unless otherwise noted,  
1006 simulations are conducted with an average selection coefficient of 0.05 and a population size of  
1007 100,000. Selection coefficients are held constant at  $\pm 0.06$  within each environment while the  
1008 timescale of environmental change is varied (beneficial environmental epochs are shaded grey  
1009 while deleterious epochs are unshaded). **A.** When the environment changes fast relative to  
1010 changes in allele frequency (small  $\tau$ ), the average change in allele frequency is well  
1011 approximated by a fitness average like geometric mean fitness. **B.** When the environment  
1012 changes slower than the time of fixation of an allele (large  $\tau$ ), mutations tend to arise and fix all  
1013 in the same environment, regardless of their average fitness effect. **C.** In infinite populations,  
1014 averages like the geometric mean fitness are accurate regardless of the timescale of  
1015 environmental change. This is an artifact of the fact that, in the absence of genetic drift, allele  
1016 frequencies can become arbitrarily close to zero or one but never permanently achieve fixation or  
1017 extinction. **D.** Average fitness breaks down when large fluctuations in allele frequency occur on  
1018 a similar timescale to environmental change (intermediate  $\tau$ ). This is due to the amplification of  
1019 fluctuations by genetic drift whenever alleles reach very high or very low frequencies (Cvijović  
1020 et al. 2015). Note that genetic drift occurring as the frequency of the allele approaches 1 causes it  
1021 to respond only modestly to the second deleterious epoch. The allele subsequently achieved  
1022 fixation much sooner than would be expected on the basis of its average fitness effect.  
1023



1024 **Table 1.** Sources of variability across a lineage and associated adaptations (*Typeset near*  
 1025 *'Introduction'*)

|                          | <b>Basis of variability in fitness</b> |                         |                       |
|--------------------------|----------------------------------------|-------------------------|-----------------------|
|                          | <b>Environmental</b>                   | <b>Genetic</b>          | <b>Social</b>         |
| <b>Specific examples</b> | Spatial variation                      | Sex                     | Kin selection         |
|                          | Temporal variation                     | Mutation                | Multi-level selection |
|                          |                                        | Clonal interference     |                       |
|                          |                                        | Epistasis               |                       |
| <b>Adaptations</b>       | Bet-hedging                            | Sex/recombination       | Cooperation           |
|                          | Phenotypic plasticity                  | Mutation rate modifiers | Policing              |
|                          |                                        | Evolvability            |                       |

1026

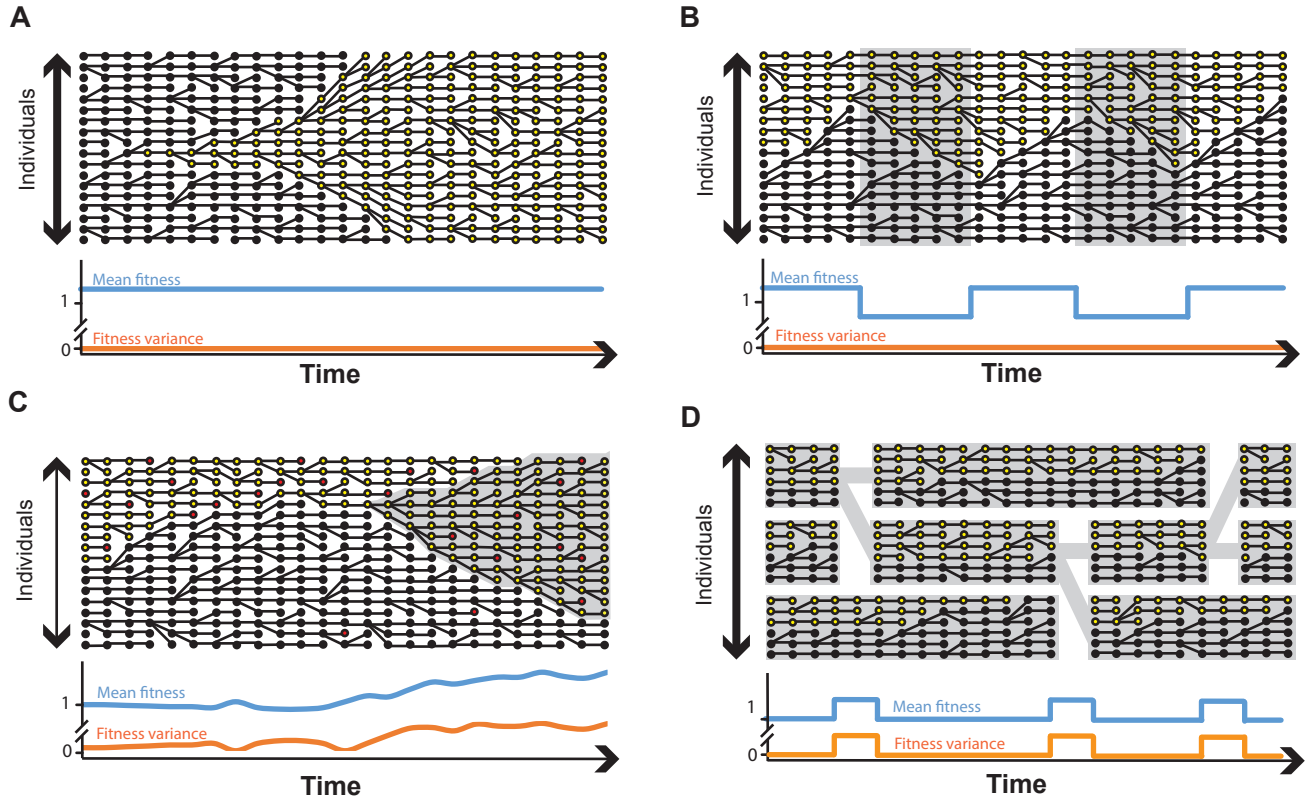

Figure 1

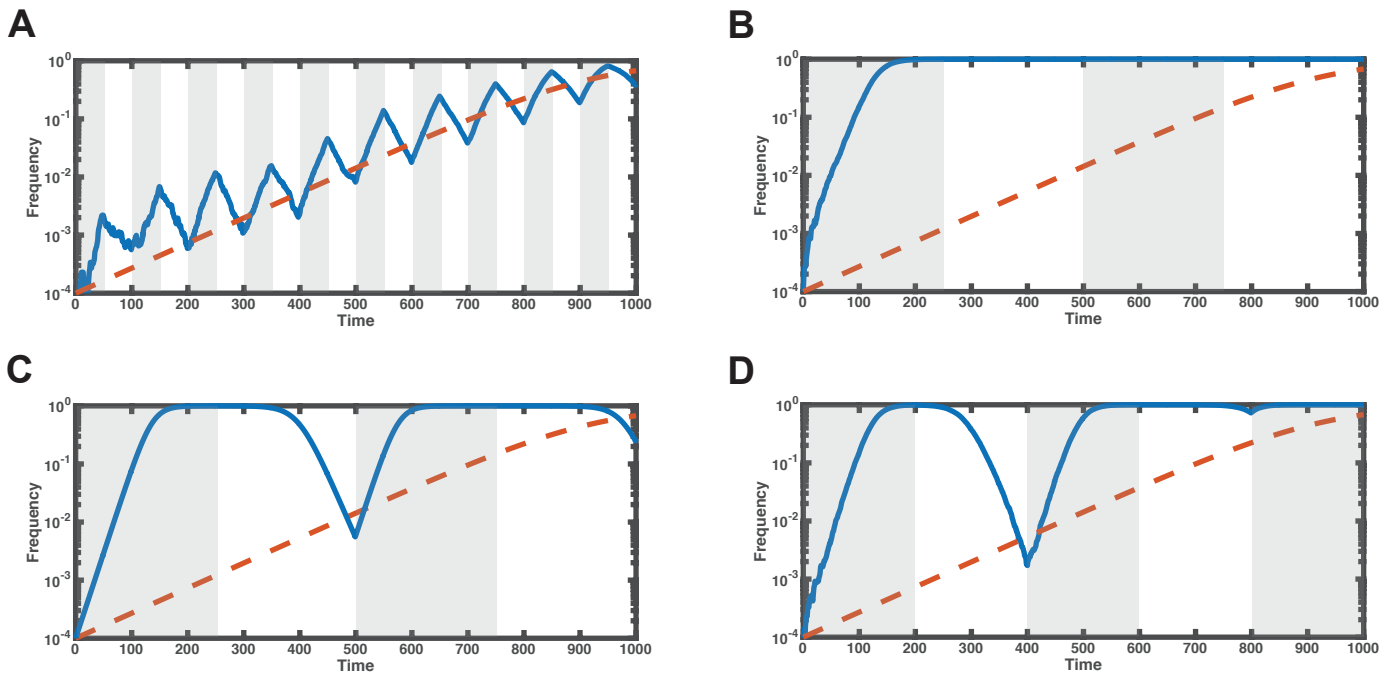

Figure 2
